# Supplementary material for: Infection of Cronobacter sakazakii ST1 Producing SHV-12 in a Premature Infant Born from Triplet Pregnancy
Source: MDPI journal article supplement (doi:10.3390/microorganisms9091878), 2021-09-04
Supplement: s1 [file s1]

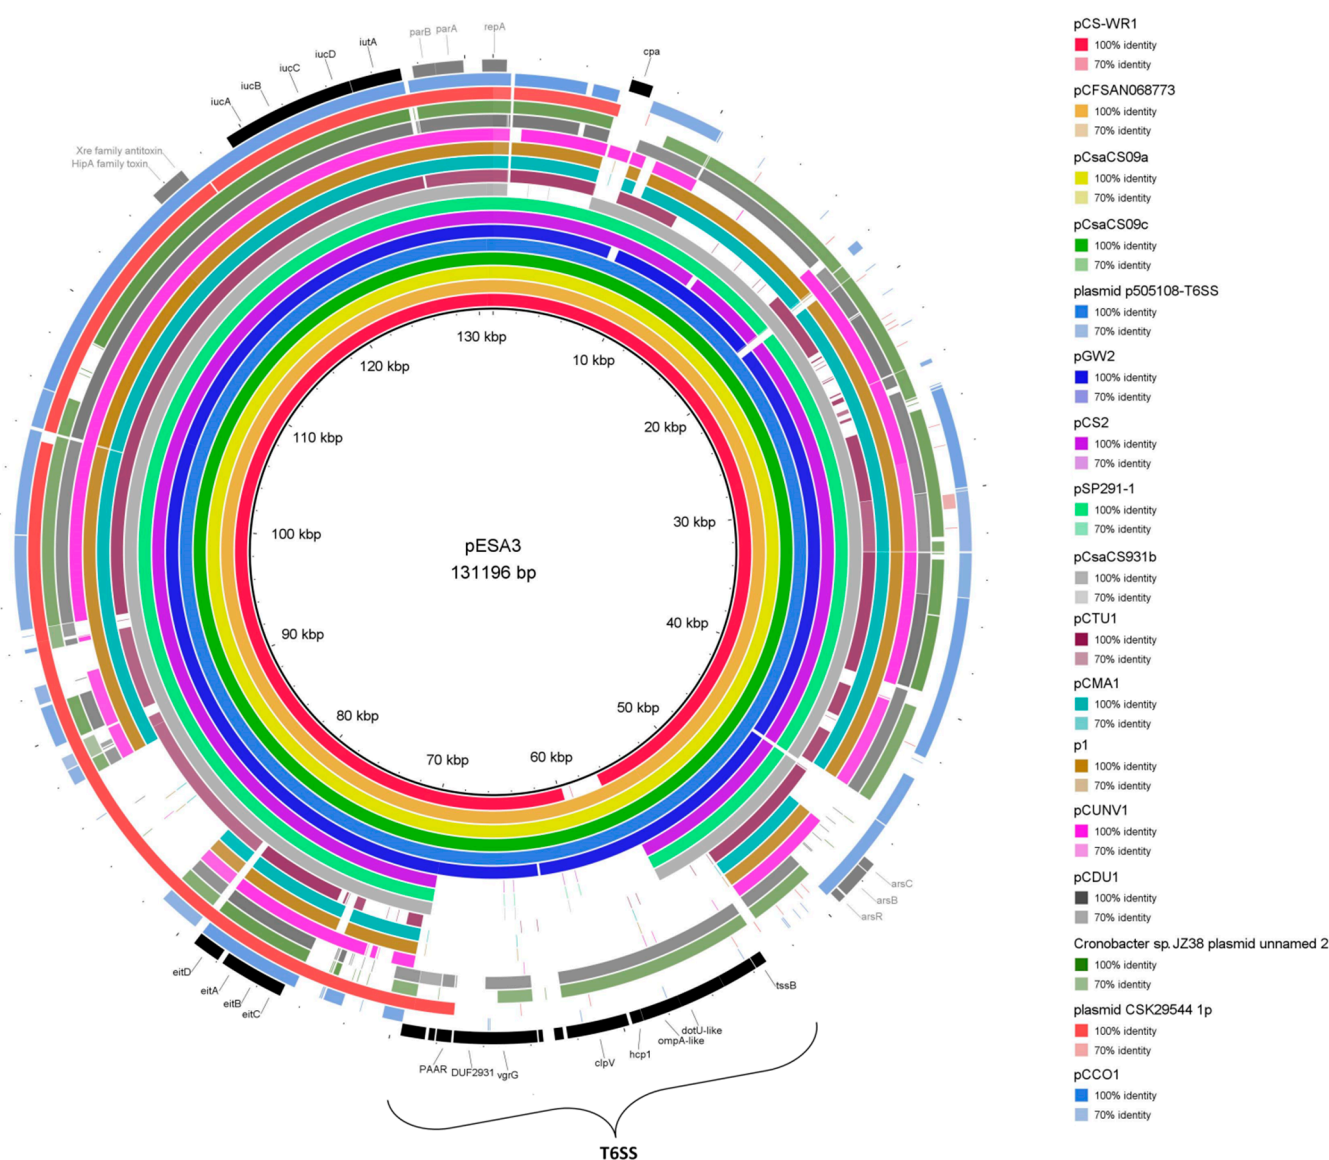

**Figure S1.** Comparison of the pESA3 plasmid (inner, thin black circle) to pCS-WR1 and previously reported similar plasmids from *Cronobacter* species. The outer thick ring refers to the annotation of pESA3 - black colour represents virulence factors, gray - plasmid maintenance plus *arsCBR* operon. The percentage of sequence identity is reflected by color intensity. The picture was created using BRIG software (<http://brig.sourceforge.net/>).

**Table S1.** *C. sakazakii* ST1 isolates included in the genomic study with numbers of SNPs, acquired resistance genes and basic epidemiological data.

| Isolate     | Number of SNPs | Acquired resistance genes       | Country  | Source   | Year | Database |
|-------------|----------------|---------------------------------|----------|----------|------|----------|
| NMI5563_17  | reference      | <i>blashV-12</i> , <i>qnrS1</i> | Poland   | Clinical | 2018 | PubMLST  |
| C.46        | 243            | -                               | China    | Food     | 2006 | PubMLST  |
| MOD1_Jor173 | 288            | -                               | Jordan   | Food     | -    | PubMLST  |
| MOD1_Jor175 | 289            | -                               | Jordan   | Food     | 2008 | GenBank  |
| ZV-3439-16  | 297            | -                               | Slovenia | Food     | 2016 | PubMLST  |

|               |     |                                                                                                          |             |               |      |         |
|---------------|-----|----------------------------------------------------------------------------------------------------------|-------------|---------------|------|---------|
| MOD1_LR707    | 298 | -                                                                                                        | USA         | Food          | 2006 | PubMLST |
| MOD1_LR708    | 299 | -                                                                                                        | USA         | Food          | 2006 | PubMLST |
| MOD1_LR723    | 299 | -                                                                                                        | USA         | Food          | 2004 | PubMLST |
| MOD1_LR688    | 300 | -                                                                                                        | USA         | Food          | 2004 | PubMLST |
| 101807-1-17   | 300 | -                                                                                                        | Austria     | Clinical      | 2017 | PubMLST |
| 70030374      | 300 | -                                                                                                        | Norway      | Clinical      | 2011 | PubMLST |
| MOD1_LR704    | 301 | -                                                                                                        | USA         | Food          | 2004 | GenBank |
| MOD1_LR733    | 303 | -                                                                                                        | USA         | Food          | 2007 | PubMLST |
| 2015004       | 304 | <i>mcr-9.1</i>                                                                                           | China       | Food          | 2020 | PubMLST |
| 011039Y87     | 308 | <i>mcr-9.1</i>                                                                                           | Denmark     | Clinical      | 1987 | PubMLST |
| CFS-2433      | 308 | <i>mcr-9.1</i>                                                                                           | Canada      | Clinical      | 2009 | PubMLST |
| MOD1-E657     | 308 | <i>mcr-9.1</i>                                                                                           | Ireland     | Clinical      | 2019 | PubMLST |
| MOD1-E654     | 309 | <i>mcr-9.1</i>                                                                                           | Ireland     | Clinical      | -    | PubMLST |
| ZV-7384-17    | 312 | -                                                                                                        | Slovenia    | Food          | 2017 | PubMLST |
| ZV-7385-17    | 312 | -                                                                                                        | Slovenia    | Food          | 2017 | PubMLST |
| C.43          | 313 | <i>mcr-9.1</i>                                                                                           | China       | Food          | 2006 | PubMLST |
| CH44          | 313 | <i>mcr-9.1</i>                                                                                           | Chile       | -             | 2017 | PubMLST |
| CH45          | 313 | <i>mcr-9.1</i>                                                                                           | Chile       | -             | 2017 | PubMLST |
| CH65          | 313 | <i>mcr-9.1</i>                                                                                           | Singapore   | -             | 2017 | PubMLST |
| CS-24         | 314 | -                                                                                                        | New Zealand | -             | 2005 | PubMLST |
| CH42          | 314 | <i>mcr-9.1</i>                                                                                           | Chile       | -             | 2017 | PubMLST |
| CH43          | 314 | <i>mcr-9.1</i>                                                                                           | Chile       | -             | 2017 | PubMLST |
| CH84          | 315 | <i>mcr-9.1</i>                                                                                           | Chile       | -             | 2017 | PubMLST |
| 2015050       | 317 | -                                                                                                        | China       | Food          | 2020 | PubMLST |
| HA18074       | 318 | <i>mcr-9.1</i>                                                                                           | China       | Food          | 2020 | PubMLST |
| MOD1_LR626    | 318 | -                                                                                                        | USA         | Food          | 2004 | GenBank |
| 1536          | 319 | -                                                                                                        | Germany     | Environmental | 2009 | PubMLST |
| MOD1_WNTSBCO4 | 319 | <i>mcr-9.1</i>                                                                                           | USA         | Food          | 2015 | PubMLST |
| MOD1_LR736    | 319 | <i>mcr-9.1</i>                                                                                           | USA         | Food          | 2018 | PubMLST |
| ZV-4531-17    | 320 | -                                                                                                        | Slovenia    | Food          | 2017 | PubMLST |
| 17-2222-1     | 320 | <i>bla</i> <sub>TEM-1</sub> , <i>dfrA16</i> , <i>ere(A)</i> , <i>qnrS1</i> , <i>sul1</i> , <i>tet(D)</i> | Switzerland | Food          | 2017 | PubMLST |
| 2089          | 321 | <i>mcr-9.1</i>                                                                                           | France      | Clinical      | 2004 | PubMLST |
| ZV-3491-16    | 321 | <i>mcr-9.1</i>                                                                                           | Slovenia    | Food          | 2016 | PubMLST |
| MOD1_LR735    | 322 | <i>mcr-9.1</i>                                                                                           | USA         | Food          | 2004 | PubMLST |
| HA18076       | 323 | -                                                                                                        | China       | Food          | 2020 | PubMLST |
| 1915009       | 323 | <i>mcr-9.1</i>                                                                                           | China       | Food          | 2019 | PubMLST |
| 1915010       | 323 | <i>mcr-9.1</i>                                                                                           | China       | Food          | 2019 | PubMLST |
| MOD1_LR640    | 324 | -                                                                                                        | USA         | Food          | 2005 | PubMLST |
| MOD1_LR639    | 325 | -                                                                                                        | USA         | Food          | 2005 | PubMLST |
| MOD1_GK1259   | 325 | <i>mcr-9.1</i>                                                                                           | Germany     | Environmental | 2014 | PubMLST |
| MOD1_LR752    | 326 | -                                                                                                        | USA         | Food          | 2008 | PubMLST |

|              |     |                |             |               |      |         |
|--------------|-----|----------------|-------------|---------------|------|---------|
| MOD1_LR755   | 326 | -              | USA         | Food          | 2004 | PubMLST |
| C.23         | 326 | -              | China       | Food          | 2006 | PubMLST |
| MOD1_GK1160  | 326 | <i>mcr-9.1</i> | Germany     | Environmental | 2014 | PubMLST |
| 2064         | 327 | -              | France      | Environmental | -    | PubMLST |
| MOD1_LR711   | 327 | -              | USA         | Food          | 2004 | GenBank |
| ATCC BAA-894 | 328 | -              | USA         | Food          | 2001 | PubMLST |
| 1218         | 328 | -              | USA         | Clinical      | 2001 | PubMLST |
| MOD1_LR722   | 328 | -              | USA         | Food          | 2006 | PubMLST |
| MOD1_LR714   | 328 | -              | USA         | Food          | 2004 | GenBank |
| CFSAN068773  | 331 | -              | USA         | -             | 1996 | PubMLST |
| cro911C2-2   | 333 | <i>mcr-9.1</i> | China       | Food          | 2012 | PubMLST |
| cro910W      | 335 | -              | China       | Food          | 2012 | PubMLST |
| C.33         | 335 | -              | China       | Food          | 2006 | PubMLST |
| 1915001      | 336 | <i>mcr-9.1</i> | China       | Food          | 2019 | PubMLST |
| MOD1-254N    | 337 | -              | Ireland     | Clinical      | -    | PubMLST |
| CE63-G       | 337 | -              | China       | Food          | -    | PubMLST |
| MOD1_GK793   | 338 | <i>mcr-9.1</i> | Germany     | Environmental | 2019 | PubMLST |
| D97986       | 339 | -              | Denmark     | Clinical      | 2017 | PubMLST |
| D99823       | 339 | -              | Denmark     | Clinical      | 2017 | PubMLST |
| MOD1_GK1260  | 339 | <i>mcr-9.1</i> | Germany     | Environmental | 2019 | PubMLST |
| MOD1_GK1261  | 340 | <i>mcr-9.1</i> | Germany     | Environmental | 2019 | PubMLST |
| CS-49        | 341 | -              | New Zealand | Food          | 2006 | PubMLST |
| MOD1_3-21    | 342 | -              | South Korea | Food          | 2011 | PubMLST |
| MOD1_LR728   | 342 | -              | USA         | Food          | 2004 | GenBank |
| CFSAN019570  | 344 | -              | USA         | Environmental | 2014 | PubMLST |
| CFSAN019558  | 344 | -              | USA         | Environmental | 2014 | PubMLST |
| CFSAN022313  | 344 | -              | USA         | Environmental | 2014 | PubMLST |
| CFSAN019560  | 344 | -              | USA         | Environmental | 2014 | PubMLST |
| MOD1_LR627   | 345 | -              | USA         | Food          | 2004 | GenBank |
| CFSAN019561  | 346 | -              | USA         | Environmental | 2014 | PubMLST |
| CFSAN022311  | 346 | -              | USA         | Environmental | 2014 | PubMLST |
| CFSAN022312  | 346 | -              | USA         | Environmental | 2014 | PubMLST |
| CFSAN022320  | 347 | -              | USA         | Environmental | 2014 | PubMLST |
| CFSAN019566  | 347 | -              | USA         | Environmental | 2014 | PubMLST |
| CFSAN022310  | 347 | -              | USA         | Environmental | 2014 | PubMLST |
| CFSAN022319  | 348 | -              | USA         | Environmental | 2014 | PubMLST |
| CFSAN019559  | 348 | -              | USA         | Environmental | 2014 | PubMLST |
| CFSAN019563  | 348 | -              | USA         | Environmental | 2014 | PubMLST |
| 5164-1       | 348 | -              | Switzerland | Food          | 2017 | PubMLST |
| CFSAN022315  | 349 | -              | USA         | Environmental | 2014 | PubMLST |
| CFSAN019564  | 349 | -              | USA         | Environmental | 2014 | PubMLST |
| CFSAN022317  | 349 | -              | USA         | Environmental | 2014 | PubMLST |

|                 |      |                  |             |               |      |         |
|-----------------|------|------------------|-------------|---------------|------|---------|
| CFSAN022316     | 353  | -                | USA         | Environmental | 2014 | PubMLST |
| CFSAN019565     | 354  | -                | USA         | Environmental | 2014 | PubMLST |
| CFSAN019568     | 354  | -                | USA         | Environmental | 2014 | PubMLST |
| CFSAN019562     | 354  | -                | USA         | Environmental | 2014 | PubMLST |
| CFSAN019567     | 355  | -                | USA         | Environmental | 2014 | PubMLST |
| CFSAN022314     | 355  | -                | USA         | Environmental | 2014 | PubMLST |
| HA18020         | 355  | <i>mcr-9.1</i>   | China       | Food          | 2018 | PubMLST |
| HA18071         | 355  | <i>mcr-9.1</i>   | China       | Food          | 2018 | PubMLST |
| HA18070         | 355  | <i>mcr-9.1</i>   | China       | Food          | 2020 | PubMLST |
| HA18075         | 355  | <i>mcr-9.1</i>   | China       | Food          | 2018 | PubMLST |
| 1915047         | 358  | <i>mcr-9.1</i>   | China       | Food          | 2019 | PubMLST |
| C757            | 358  | -                | Mexico      | Clinical      | 2006 | PubMLST |
| C767            | 359  | -                | Mexico      | Clinical      | 2006 | PubMLST |
| CFSAN022298     | 364  | -                | USA         | Environmental | 2014 | PubMLST |
| MOD1_GK1519     | 364  | -                | Germany     | Environmental | 2015 | PubMLST |
| MOD1_GK1513     | 364  | <i>mcr-9.1</i>   | Germany     | Environmental | 2015 | PubMLST |
| MOD1_GK1032     | 365  | <i>mcr-9.1</i>   | Germany     | Environmental | 2019 | PubMLST |
| MOD1_GK1521     | 365  | -                | Germany     | Environmental | 2015 | PubMLST |
| 2015054         | 366  | <i>mcr-9.1</i>   | China       | Food          | 2020 | PubMLST |
| 3770-1          | 379  | -                | Switzerland | -             | 2017 | PubMLST |
| 2015006         | 381  | -                | China       | Food          | 2020 | PubMLST |
| 35SS2           | 393  | -                | Switzerland | Environmental | 2012 | PubMLST |
| CFSAN022299     | 460  | -                | USA         | Environmental | 2014 | PubMLST |
| cro810A3        | 472  | -                | China       | Food          | 2012 | PubMLST |
| 800979          | 2362 | -                | Austria     | Clinical      | 2009 | PubMLST |
| 800978          | 2364 | -                | Austria     | Clinical      | 2009 | PubMLST |
| MOD1-nm1241     | 2393 | -                | USA         | Clinical      | 2008 | GenBank |
| 1241            | 2439 | <i>ant(6)-Ia</i> | USA         | Clinical      | 2009 | PubMLST |
| C.25            | 2443 | -                | China       | Food          | 2006 | PubMLST |
| C.31            | 2467 | -                | China       | Food          | 2006 | PubMLST |
| MGYG-HGUT-02460 | 2480 | -                | UK          | Clinical      | 2019 | PubMLST |
| CS-09           | 2480 | -                | Mexico      | Clinical      | 2016 | PubMLST |
